# Supplementary material for: Impact of a pharmacist driven antimicrobial stewardship program on inpatient antibiotic consumption in a Chinese Tertiary Hospital: a 5-year retrospective study
Source: Front Med (Lausanne). 2025 Jun 25;12:1583134. doi: 10.3389/fmed.2025.1583134 (PMC12238102; doi:10.3389/fmed.2025.1583134)
Supplement: Supplementary file 1 [file Table_1.xlsx]

## Sheet: inpatient AUD
Table S1: Inpatient AUD data from 2020 to 2024
Year and month	AUD		Year	Annual AUD	Decrease (compare to year 2020)%
2020.01	51.67		2020	46.58	/
2020.02	51.33		2021	36.56	21.5114
2020.03	56.47		2022	35.18	24.474
2020.04	45.64		2023	38.76	16.7883
2020.05	45.58		2024	36.2	22.2842
2020.06	45.8			AVG	21.26
2020.07	48
2020.08	48.09
2020.09	49.24
2020.10	44.64
2020.11	45.98
2020.12	47.02
2021.01	56.13
2021.02	55.08
2021.03	40.51
2021.04	35.17
2021.05	33.46
2021.06	34.92
2021.07	35.21
2021.08	33.71
2021.09	33.94
2021.10	30.86
2021.11	31.31
2021.12	33.29
2022.01	30.25
2022.02	37.26
2022.03	32.65
2022.04	31.49
2022.05	32.2
2022.06	34.21
2022.07	33.3
2022.08	38.18
2022.09	35.35
2022.10	34.66
2022.11	33.91
2022.12	41.47
2023.01	53.15
2023.02	40.36
2023.03	37.81
2023.04	37.21
2023.05	37.57
2023.06	36.44
2023.07	35.91
2023.08	34.66
2023.09	35.46
2023.10	41.3
2023.11	37.27
2023.12	35.67
2024.01	43.68
2024.02	43.25
2024.03	37.68
2024.04	37.53
2024.05	36.68
2024.06	34.41
2024.07	36.06
2024.08	36.13
2024.09	35.44
2024.10	34.5
2024.11	32.03
2024.12	35.15

## Sheet: inpatient antibiotic usage rate
Table S2: Inpatient antibiotic usage rate data from 2020 to 2024
Year and month	Rate (%)		Year	Annul rate (%)	Decrease (compare to year 2020)%
2020.01	52.75		2020	46.25	/
2020.02	59.38		2021	44.31	4.19459
2020.03	49.04		2022	43.96	4.95135
2020.04	43.74		2023	43.7	5.51351
2020.05	45.84		2024	41.57	10.1189
2020.06	44.33
2020.07	47.03
2020.08	46.81
2020.09	42.1
2020.10	44.98
2020.11	45.98
2020.12	44.26
2021.01	47.09
2021.02	47.1
2021.03	39.35
2021.04	41.23
2021.05	42.66
2021.06	39.63
2021.07	40.4
2021.08	40.34
2021.09	36.76
2021.10	38.12
2021.11	38.51
2021.12	42.11
2022.01	41.71
2022.02	45.12
2022.03	43.04
2022.04	40.81
2022.05	41.88
2022.06	43.1
2022.07	43.72
2022.08	45.71
2022.09	40.43
2022.10	42.31
2022.11	40.96
2022.12	50.05
2023.01	56.34
2023.02	41.61
2023.03	42.28
2023.04	42.14
2023.05	42.8
2023.06	42.83
2023.07	41.95
2023.08	41.31
2023.09	41.18
2023.10	44.48
2023.11	43.08
2023.12	46.24
2024.01	48.41
2024.02	46.78
2024.03	43.4
2024.04	40.78
2024.05	41.24
2024.06	40.51
2024.07	41.28
2024.08	41.44
2024.09	41.82
2024.10	38.48
2024.11	40.04
2024.12	43.33

## Sheet: expenditures and proportion
Table S3: Proportion of inpatient antibiotic expenditure to total and antibiotic expenditure per inpatient data from 2020 to 2024
Year and month	Inpatient antibiotic expenditure （in RMB）	Inpatient antibiotic expenditure （in USD）	Estimated inpatient antibiotic expenditure （in USD）*	Number of discharges	Antibiotic expenduture per inpatient	Estimated Antibiotic expenduture per inpatient (in USD)*	Expenditure of total drugs (in RMB)	Proportion
2020.01	3.98758e+06	546244	/	6521	83.7669	/	1.56491e+07	0.254812
2020.02	1.53041e+06	209645	/	1633	128.38	/	6.62204e+06	0.231108
2020.03	2.53709e+06	347546	/	3422	101.562	/	1.25658e+07	0.201904
2020.04	3.13616e+06	429610	/	5971	71.9495	/	1.63916e+07	0.191327
2020.05	3.35097e+06	459037	/	5795	79.2126	/	1.5975e+07	0.209763
2020.06	3.5487e+06	486124	/	6003	80.9801	/	1.67293e+07	0.212126
2020.07	3.82828e+06	524421	/	6260	83.7734	/	1.74587e+07	0.219277
2020.08	3.81495e+06	522596	/	6314	82.7678	/	1.67709e+07	0.227474
2020.09	3.61978e+06	495860	/	6567	75.5079	/	1.71409e+07	0.211178
2020.10	3.8262e+06	524137	/	5811	90.1974	/	1.69219e+07	0.226109
2020.11	3.85849e+06	528560	/	6678	79.1494	/	1.80867e+07	0.213333
2020.12	3.86187e+06	529023	/	6714	78.794	/	1.85756e+07	0.2079
2021.01	3.85283e+06	527785	/	6147	85.8606	/	1.83216e+07	0.210289
2021.02	3.23632e+06	443331	/	4961	89.3633	/	1.47576e+07	0.219298
2021.03	3.42698e+06	469449	/	7266	64.6091	/	1.87888e+07	0.182395
2021.04	3.23145e+06	442665	/	7425	59.6181	/	1.80126e+07	0.1794
2021.05	3.17307e+06	434667	/	6967	62.3894	/	1.70894e+07	0.185675
2021.06	3.22618e+06	441943	/	7026	62.9011	/	1.76536e+07	0.18275
2021.07	3.35094e+06	459033	/	7487	61.3107	/	1.79219e+07	0.186975
2021.08	2.77419e+06	380026	/	6453	58.8914	/	1.62269e+07	0.170963
2021.09	2.71094e+06	371362	/	6907	53.766	/	1.58337e+07	0.171214
2021.10	2.70315e+06	370295	/	6225	59.4852	/	1.513e+07	0.178662
2021.11	2.92128e+06	400175	/	6776	59.0577	/	1.47214e+07	0.198438
2021.12	3.13003e+06	428772	/	7358	58.2728	/	1.50925e+07	0.20739
2022.01	3.20888e+06	439572	/	7216	60.9163	/	1.55196e+07	0.206763
2022.02	2.99663e+06	410497	/	5046	81.3509	/	1.40225e+07	0.213701
2022.03	3.16618e+06	433723	/	7549	57.4544	/	1.7996e+07	0.175938
2022.04	2.93994e+06	402732	/	7393	54.4747	/	1.66841e+07	0.176212
2022.05	3.10533e+06	425388	/	6697	63.5191	/	1.63808e+07	0.189571
2022.06	2.81955e+06	386240	/	7096	54.4307	/	1.6241e+07	0.173607
2022.07	3.30658e+06	452957	/	7545	60.034	/	1.62682e+07	0.203254
2022.08	3.6511e+06	500150	/	6947	71.9952	/	1.60902e+07	0.226915
2022.09	3.12972e+06	428729	/	7045	60.8558	/	1.52866e+07	0.204736
2022.10	2.82436e+06	386899	/	6426	60.2084	/	1.44832e+07	0.19501
2022.11	2.75289e+06	377108	/	6854	55.0202	/	1.37119e+07	0.200766
2022.12	3.53283e+06	483949	/	4351	111.227	/	1.40833e+07	0.250852
2023.01	4.54894e+06	623142	/	5823	107.014	/	1.75536e+07	0.259146
2023.02	3.00785e+06	412034	/	7067	58.304	/	1.4704e+07	0.20456
2023.03	3.12121e+06	427563	/	8230	51.9518	/	1.60881e+07	0.194008
2023.04	3.11596e+06	426844	/	7983	53.4691	/	1.52987e+07	0.203675
2023.05	3.08691e+06	422864	/	7633	55.3995	/	1.62405e+07	0.190075
2023.06	3.01644e+06	413211	/	7624	54.1987	/	1.50268e+07	0.200737
2023.07	2.7181e+06	372343	/	7882	47.2396	/	1.46529e+07	0.1855
2023.08	2.04526e+06	280173	/	8012	34.9692	/	1.3846e+07	0.147716
2023.09	1.96926e+06	269762	/	7968	33.8557	/	1.32117e+07	0.149055
2023.10	2.26062e+06	309674	/	7733	40.0458	/	1.44014e+07	0.156972
2023.11	2.08301e+06	285344	/	8594	33.2027	/	1.48537e+07	0.140235
2023.12	2.19795e+06	301089	/	8387	35.8994	/	1.48319e+07	0.14819
2024.01	2.40487e+06	329435	464607	8253	39.917	56.2955	1.58654e+07	0.151579
2024.02	1.89656e+06	259803	362780	4718	55.0664	76.8927	1.11422e+07	0.170214
2024.03	2.0851e+06	285630	454168	8898	32.1005	51.0416	1.57037e+07	0.132778
2024.04	1.97747e+06	270886	423987	8612	31.4545	49.2321	1.46513e+07	0.134969
2024.05	2.04035e+06	279500	411807	8022	34.8417	51.3347	1.42044e+07	0.143642
2024.06	1898253	260035	369389	7734	33.6223	47.7618	1.35482e+07	0.140111
2024.07	2.06855e+06	283363	420159	8507	33.3094	49.3899	1.47396e+07	0.14034
2024.08	2.18544e+06	299375	442629	7878	38.0015	56.1855	1.43694e+07	0.15209
2024.09	1.99329e+06	273053	392372	7320	37.3024	53.6027	1.36032e+07	0.146531
2024.10	1.97648e+06	270750	393110	7425	36.4647	52.9441	1.4056e+07	0.140614
2024.11	1.90071e+06	260371	365518	8252	31.5525	44.2944	1.46683e+07	0.129579
2024.12	2.05708e+06	281791	408448	8044	35.0312	50.7768	1.50792e+07	0.136418
Note: "Estimated inpatient antibiotic expenditure (in USD)" refers to the calculated inpatient antibiotic expenditure after adjusting for the price reduction resulting from national centralized procurement policies. Correspondingly, "Estimated Antibiotic Expenditure per Inpatient (in USD)" refers to the adjusted estimated inpatient antibiotic expenditure divided by the total number of discharges.

## Sheet: major antibiotics AUD
Table S4: Monthly Inpatient AUD data for Major Antibiotics from 2020 to 2024.
Drugs/date	202001	202002	202003	202004	202005	202006	202007	202008	202009	202010	202011	202012	202101	202102	202103	202104	202105	202106	202107	202108	202109	202110	202111	202112	202201	202202	202203	202204	202205	202206	202207	202208	202209	202210	202211	202212	202301	202302	202303	202304	202305	202306	202307	202308	202309	202310	202311	202312	202401
Cefathiamidine Inj.	0.052691	0.00606756	0.0498373	0	0.00613738	0.0264315	0.0155029	0.00391159	0.00548665	0.0129389	0.00369323	0	0	0	0	0	0	0	0	0	0	0	0	0	0	0	0	0	0	0	0	0	0	0	0	0	0	0	0	0	0	0	0	0	0	0	0	0	0
Cefazolin Inj.	3.70109	4.92686	6.96572	5.44232	5.33952	5.68683	5.52292	5.60726	4.93981	5.34161	4.79935	4.26125	4.45622	3.30936	3.81246	1.60945	3.71619	4.24096	4.43885	3.68765	3.54289	2.93413	3.0564	2.48628	2.8417	3.36278	3.08737	3.00473	3.06767	3.17058	2.95923	2.70897	2.38139	2.55481	2.22361	2.33378	2.12778	2.91154	2.58591	2.42377	2.56686	2.32127	2.55597	2.79565	2.18149	2.59414	1.75278	1.64846	2.14881
Cefprozil Oral	0.198045	0.169892	0.203183	0.232758	0.165709	0.262281	0.321686	0.281634	0.252386	0.325629	0.439494	0.293033	0.399495	0.339356	0.40037	0.434985	0.399307	0.356181	0.28386	0.27912	0.231426	0.271679	0.534966	0.301417	0.511041	1.01487	1.85346	2.31562	2.56722	2.49077	2.10227	2.02878	2.1283	2.78934	2.59994	3.20446	3.07958	2.56852	1.96119	2.34843	1.95021	2.57077	2.19561	1.92391	1.66934	2.4376	1.83269	1.56038	1.75127
Cefuroxime Oral	0	0	0	0	0	0	0	0	0	0	0	0	0	0	0	0	0	0	0	0	0	0	0	0	0	0	0	0	0	0	0	0	0	0	0	0	0	0	0	0	0	0	0	0	0	0	0	0	0
Cefuroxime Inj.	1.88961	0.242702	3.04007	2.71269	2.13172	1.98236	2.34482	2.45257	2.07029	1.91711	1.90016	1.62887	1.76066	1.51817	1.75519	1.73298	1.75544	2.24413	2.39329	2.94808	2.60025	2.52118	2.26258	2.04963	2.74491	2.55363	1.76123	1.49697	1.49738	1.61222	1.80143	2.08579	1.66598	1.31611	1.27739	1.10705	0.994595	1.3742	1.02671	0.762597	0.879579	0.907439	0.971491	1.15577	1.16429	1.47412	2.2594	1.6988	1.85065
Cefmetazole Inj.	0.717687	0.376188	0.912405	0.467633	0.0204579	0	0	0	0	0	0	0	0	0	0	0	0	0	0	0	0	0	0	0	0	0	0	0	0	0	0	0	0	0	0	0	0	0	0	0	0	0	0	0	0	0	0	0	0
Cefixime Oral	0.50874	0.57035	0.187848	0.156583	0.210717	0.355808	0.228668	0.221005	0.331028	0.55206	0.46904	0.631903	0.88136	0.70933	0.484377	0.715116	0.595193	0.551804	0.518044	0.409512	0.536231	0.993258	0.728628	0.557214	0.640737	0.707666	0.522102	0.548767	0.443304	0.531215	0.616278	0.929858	0.745305	0.573807	0.43655	0.350067	0	0.491532	0.737838	0.641317	0.802025	0.702295	0.544258	0.71633	0.737204	0.87776	0.765035	0.8494	1.12239
Cefdinir Oral	0.861225	0.515742	0.705389	0.505721	0.366197	0.294813	0.393387	0.578915	0.422472	0.474426	0.408101	0.455101	0.531287	0.694021	0.391434	0.30101	0.45958	0.441074	0.381436	0.321905	0.312331	0.167354	0.335552	0.285124	0.454904	0.438862	0.339367	0.359847	0.346762	0.330617	0.44124	0.636943	0.571932	0.70132	0.623643	1.29255	1.94435	1.12948	0.729137	0.578839	0.733928	0.839058	0.748586	0.77528	1.03138	1.19644	0.885741	0.921756	1.1735
Cefditoren Oral	0.799449	0.691701	0.391031	0.467633	0.421433	0.4717	0.420517	0.38138	0.585242	0.414045	0.371169	0.446916	0.595124	0.566444	0.316364	0.323629	0.305131	0	0	0	0	0	0	0	0	0	0.00870171	0.0449809	0.0788097	0.0352905	0.0164098	0.0117952	0.00797118	0.00910805	0.00215049	0.00299202	0	0	0.00174018	0.0330765	0.0643133	0.0184815	0.027863	0.0482317	0.0106328	0.0316814	0.0629029	0.0346052	0.0424108
Ceftriaxone Inj.	1.64432	1.53509	2.097	1.26536	1.47093	0.825475	1.1104	1.32016	0.773617	1.06099	1.10058	1.79912	4.83307	4.31212	5.27631	8.49787	7.22519	3.48615	3.25197	2.46726	2.86555	3.5014	2.71893	2.61011	3.89281	4.58611	2.58963	2.34621	3.30607	3.23373	3.08868	3.84721	2.54081	3.38364	3.02789	8.29688	5.40913	3.69381	3.70833	3.3003	3.5883	3.31188	3.41415	3.68704	3.484	3.90054	3.50556	3.75938	3.13411
Cefotaxime Inj.	11.4757	14.4165	13.4062	9.51559	10.1001	10.5197	11.2803	10.1623	10.0387	12.747	11.5081	9.12658	1.75242	0.464382	0	0	0	4.09701	2.94504	2.69952	2.54945	4.06214	3.98445	3.19339	3.85991	5.31023	3.24226	3.51751	3.44792	3.24487	3.10874	3.81772	3.04499	2.53659	2.07522	6.33711	4.82419	4.18534	4.08595	4.33118	4.45275	4.27106	3.43644	2.89569	2.91692	4.14653	0.64263	1.39836	4.5221
Ceftazidime Inj.	0.00181693	0	0.00766727	0.00423197	0.00409159	0.201286	1.38945	1.77391	1.83986	2.33978	2.31011	1.74019	4.27295	3.26088	4.98854	4.88228	6.01974	1.78091	1.84154	1.2428	1.1703	1.33231	0.696032	1.13398	0.0174218	1.16573	0.826662	1.16591	1.46389	1.27417	1.0247	1.34073	1.59822	1.47778	1.58061	2.4744	1.24121	1.45159	1.57139	1.38186	1.72511	1.60419	1.59005	1.83638	2.16022	1.96052	3.03974	1.5415	1.76861
Ceftizoxime Inj.	9.73874	11.0005	15.9786	11.3459	11.3746	9.59056	8.92001	9.92175	7.24603	10.2066	10.3521	11.24	19.6247	21.3182	6.45597	1.12922	0.352219	2.87529	1.71025	0.780314	1.06306	0.160834	0	1.41096	1.08015	1.85968	1.57327	1.25587	1.32203	1.55093	1.48053	1.2267	1.02828	1.64173	1.3161	3.06383	2.25618	1.84481	1.4722	1.11725	1.25222	1.22717	1.31142	1.14684	0.978213	0.71749	1.15095	1.47544	0.380412
Cefoperazone-Sulbactam Inj.	3.24322	4.41718	4.36268	3.10838	2.8191	2.88916	3.10834	2.70682	2.84574	3.17434	2.90842	2.60947	3.26392	3.56451	2.65067	2.47594	3.04189	3.53228	3.67243	2.91344	2.73008	4.06214	3.97102	2.84472	4.64582	5.86704	3.55552	3.33938	3.70799	3.54391	3.77789	5.22922	4.33632	4.50393	4.45152	10.502	7.94249	4.65178	3.85451	5.14891	5.16776	5.18774	4.34477	3.59594	3.39362	4.28258	2.52122	3.42749	3.3089
Penicillin G Inj.	0.348851	0.236635	0.502206	0.490909	0.175938	0.941367	0.540665	0.240563	0.378579	0.27603	0.33793	0.451827	0.0226518	0.627681	0.27168	0.165294	0.258043	0.343263	0.225314	0.211887	0.131706	0.454247	0.258855	0.169445	0.385216	0.293489	0.266272	0.49659	0.16156	0.245176	0.160451	0.440355	0.119568	0.346106	0.425797	0.0987368	0.542136	0.181971	0.165317	0.330765	0.351832	0.166333	0.516395	0.335835	0.544043	0.283269	0.43522	0.434138	0.40166
Benzathine Penicillin Inj.	0.0327047	0.00606756	0.0345027	0.0211599	0.00818317	0.0243983	0.0135651	0.019558	0.0146311	0.0323472	0.0258526	0.0212817	0.0185333	0.028067	0.019661	0.0226192	0.0244858	0.0350645	0.0212895	0.0305606	0.0263412	0.015214	0.00766977	0.011405	0.0271006	0.0301718	0.0156631	0.0179924	0.0118214	0.0241462	0.0164098	0.0452151	0.0458343	0.0204931	0.0193544	0.00897607	0.0244573	0.0292828	0.0295831	0.0183758	0.0302651	0.025874	0.0241479	0.0428726	0.0354425	0.0391358	0.0340016	0.0283133	0.036756
Amoxicillin Oral	0.792181	0.461134	1.28427	0.770219	0.572822	0.593691	0.856538	0.459612	0.855917	0.463644	0.522591	0.479657	0.671316	0.229639	0.462928	0.946528	0.872071	1.02979	0.885287	0.65196	0.504246	0.423819	0.387323	0.24928	0.416188	0.490977	0.455969	0.37784	0.346762	0.182025	0.315432	0.14744	0.169387	0.252748	0.187093	0.131649	0.103943	0.391134	0.262768	0.316064	0.162675	0.277222	0.198756	0.253663	0.396956	0.260905	0.508324	0.166734	0.316324
Amoxicillin Clavulanic Acid Oral	0.163524	0.109216	0.107342	0.0655956	0.0941065	0.103693	0.168595	0.234695	0.188375	0.157423	0.0960239	0.0163706	0.0411851	0.028067	0.0482589	0.0347988	0.171401	0.112575	0.101125	0.048897	0.0470378	0.0673764	0.0134221	0.0488784	0.0464582	0.0877725	0.187957	0.138541	0.145798	0.0204314	0.0984586	0.0982936	0.129532	0.109297	0.137631	0.0598405	0.0224191	0.050199	0.269728	0.374867	0.272386	0.162637	0.115167	0.112541	0.182529	0.203133	0.21081	0.234371	0.179068
Amoxicillin Clavulanic Acid Inj.	0.110833	0.0606756	0.0996745	0.213715	0.19435	0.0874272	0.151154	0.0606296	0.0731553	0.0452861	0.0480119	0.0491117	0.0700146	0.0306186	0.0464716	0.127016	0.414375	0.50013	0.342406	0.352466	0.225782	0.465114	0.845592	0.751098	1.0337	0.82561	0.790115	0.701703	0.618656	0.508927	0.523289	0.351891	0.300912	0.566976	0.65805	0.493684	0.16101	0.209163	0.683892	0.944518	0.841748	0.545203	0.614844	0.760989	0.742521	1.05853	0.761635	0.528515	0.843075
Ampicillin Inj.	0.599587	0.691701	0.486872	0.397805	0.366197	0.313111	0.59105	0.0528065	0.614505	0.416201	0.339777	0.332322	0.66102	0.778222	0.586257	0.508063	0.713855	0.669916	0.752228	0.794576	0.662293	1.02803	0.952969	1.02971	0.801405	0.921611	0.889314	0.910414	0.953597	0.76339	0.70562	0.770622	0.685521	0.683104	0.860197	0.430851	0.403545	0.826192	0.725657	0.700119	0.50694	0.709688	0.560975	0.346554	0.313666	0.370858	0.248212	0.166734	0.243327
Oxacillin Inj.	0	0.121351	0	0	0.337556	0.217551	0.393387	0.199491	0.448076	1.11059	0.740492	0.738312	0.971967	1.25791	1.12783	0.864751	0.821216	0.793564	1.16382	0.674371	0.850444	1.13018	0.232011	0.772279	1.42472	1.10538	0.741385	0.719695	1.32203	0.947272	0.66186	0.424628	1.46271	1.05881	1.59136	1.78923	2.05441	2.54342	2.19959	1.44802	0.942001	1.01463	1.90212	1.12362	0.756698	0.916896	1.42467	1.35432	2.62518
Mezlocillin Inj.	1.04837	0.776647	0.663219	0.402037	0.343693	0.455435	0.201538	0.217093	0.224953	0.291125	0.156962	0.12769	0.228577	0.334253	0	0.198353	0.199653	0.164249	0.131285	0.0937192	0.0827866	0.115192	0.161065	0.0505077	0.0135503	0.00548578	0.0539506	0.0215908	0.0118214	0.0705811	0.0328195	0.0255563	0.0219207	0.0136621	0.00215049	0	0	0	0	0	0	0	0	0	0	0	0	0	0
Piperacillin Inj.	0	0	0	0	0	0	0	0	0	0	0	0	0	0	0	0	0	0	0	0	0	0	0	0	0.602021	1.32207	1.57153	1.03636	1.94463	1.58064	1.93818	1.4744	1.42285	1.24097	1.3333	1.61868	1.47559	1.41812	1.50004	0.964731	1.56811	1.49515	1.35043	1.50054	1.42124	1.57661	2.052	2.09991	2.43498
Piperacillin-Sulbactam Inj.	1.53167	0.982944	0.452369	0.387225	0.527815	0.418837	0.284867	0.322706	0.431616	0.215648	0.186508	0.260292	0.457154	0.193918	0.248444	0.252292	0.207188	0.123648	0.134833	0.156878	0	0	0	0	0	0	0	0	0	0	0	0	0	0	0	0	0	0	0	0	0	0	0	0	0	0	0	0	0
Piperacillin-Tazobactam Inj.	0.806717	0.946539	0.667053	0.457053	0.564639	0.693318	0.567795	0.729512	0.660227	0.808681	0.472733	0.600799	0.749568	0.70933	0.525486	0.687277	0.467114	0.64777	0.961574	1.66453	2.07907	2.04737	2.05742	1.84435	2.27645	2.97604	2.07449	2.05113	2.39581	1.82954	2.30648	2.27058	2.28972	2.38175	1.62577	3.57547	3.01028	1.76115	1.94379	1.68506	2.20557	2.15309	2.23647	2.08111	2.70958	3.66386	3.72317	1.86553	3.21391
Azlocillin Inj.	0	0	0	0	0.11524	0.15316	0.110129	0.206336	0.213065	0.209179	0.221889	0.266021	0.253288	0.23857	0.49628	0.421344	0.61433	0.656684	0.647253	0.740239	0.528066	0.793302	0.888083	0.670449	0.506201	0.317709	0.290045	0.284873	0.20325	0.216387	0.204812	0.127113	0.390906	0.306622	0.295327	0.266769	0.189197	0.149551	0.329469	0.663055	0.181893	0.120739	0.37459	0.203341	0.0637965	0.124545	0.205421	0.0996157	0.089671
Azithromycin Inj.	0.399725	0.485404	0.218517	0.0782915	0.0777401	0.0447302	0.044571	0.0586739	0.062182	0.0301908	0.0646315	0.0703934	0.00823701	0.0408248	0.053621	0.0365388	0.0583892	0.0313735	0.0780614	0.0672333	0.0752605	0.0565092	0.0134221	0.0228099	0.160668	0.0548578	0.0121824	0.0773672	0.277804	0.154164	0.103928	0.139577	0.103625	0.100189	0.165588	0.158577	0.0550288	0.016733	0.135734	0.121281	0.145651	0.205144	0.390082	0.334049	0.691129	1.24862	1.37536	1.0067	0.815658
Azithromycin Oral	0.432429	0.485404	0.122676	0.0825234	0.0470532	0.119958	0.0678254	0.0371601	0.0768131	0.142328	0.033239	0.147335	0.0679553	0.0586856	0.0393221	0.0173994	0.12808	0.118112	0.312246	0.118168	0.120417	0.212996	0.0421837	0.0749469	0.253585	0.274289	0.10442	0.140341	0.171411	0.105872	0.262556	0.127782	0.173373	0.277795	0.232253	0.224402	0.183429	0.140139	0.184459	0.181921	0.189157	0.195903	0.24891	0.398358	0.430627	1.05667	1.28016	1.04759	1.00586
Clarithromycin Oral	0.334315	0	1.2651	0.514185	0.310961	0.205352	0.0697633	0.138861	0.151797	0.27603	0.300998	0.276662	0.185333	0	0	0	0	0	0	0	0	0	0	0	0	0	0	0	0	0	0	0	0	0	0	0	0	0	0	0	0	0	0	0	0	0	0	0	0
Clindamycin Inj.	0.0872126	0.151689	0.207016	0.243338	0.27209	0.246016	0.153092	0.146685	0.109733	0.157423	0.156962	0.101497	0.0947256	0.109717	0.0965179	0.0643778	0.167634	0.127339	0.177412	0.142616	0.0940757	0.0695498	0.0901198	0.146635	0.0503298	0.0822867	0.0574313	0.0575756	0.0531965	0.224745	0.0455827	0.0471809	0.00597838	0.0182161	0	0.0299202	0.0428002	0.0376493	0.0330635	0.0183758	0.013241	0.166333	0.163463	0.0714543	0.0815178	0.117407	0.0442021	0.0456159	0.0422566
Moxifloxacin Inj.	0.661362	1.23171	0.80123	0.281426	0.474624	0.410704	0.457337	0.477214	0.259701	0.19624	0.262219	0.291396	0.733094	0.737397	0.756056	0.727296	0.585776	0.72159	0.590783	1.32429	0.987795	2.01477	2.69976	2.17998	1.02015	3.77696	2.41733	2.15549	2.01556	1.59365	1.9637	2.32759	1.12394	1.42086	1.40642	2.70778	1.551	1.84481	1.28078	1.43883	1.42057	1.30294	1.22226	1.24866	1.10403	1.21321	1.66608	1.75857	1.60219
Moxifloxacin Oral	0.337949	1.67465	1.16159	0.243338	0.18003	0.243983	0.133713	0.0117348	0	0.0884158	0.0406255	0.148972	0.335658	0.502655	0.391434	0.412366	0.438861	0.529658	0.734487	0.676408	0.487312	0.399911	0.184074	0.527887	1.0666	1.22333	0.760529	0.728691	0.723079	0.508927	0.656391	0.945585	0.856901	0.828832	1.00428	3.88963	1.25955	1.45786	1.29818	1.58951	1.95966	1.50439	1.27798	1.41837	1.23517	1.20576	1.22066	1.25837	0.983587
Sitafloxacin Oral	0	0	0	0	0	0	0	0	0	0	0	0	0	0	0	0	0	0	0	0	0	0	0	0	0	0	0	0	0	0	0	0	0	0	0	0	0	0.123406	0.250586	0.169058	0.319675	0.27907	0.170893	0.287604	0.352653	0.482675	0.243111	0.457732	0.323864
Levofloxacin Inj.	2.6509	1.78386	2.71421	1.97633	0.288457	1.66112	2.03476	2.0262	1.30948	1.89124	1.80968	0.189898	1.79979	1.79629	1.14749	0.863011	1.05854	1.86211	1.56123	2.53653	2.30109	0.29124	0	0	0.0096788	0.510177	0.619561	0.4714	0.721108	0.783821	0.982762	1.19328	1.2734	1.38898	1.05804	1.75333	1.64679	1.28426	1.18855	1.47007	1.89913	1.62082	1.45259	1.31119	1.29542	1.51884	1.59637	2.42394	2.88051
Levofloxacin Oral	1.25186	0.982944	0.897071	0.753291	0.159572	0.156556	0.0620118	0.189712	1.03149	0.263091	0.21236	0.189898	1.25614	1.05379	0.77393	0.927389	0.945529	0.871075	1.19044	1.1939	0.829747	1.12149	1.04884	0.894475	1.24469	1.34676	1.08771	0.976986	1.03438	1.01042	0.917123	0.874813	0.655629	0.555591	0.731167	0.807846	0.915109	0.819917	0.610804	0.665205	0.970374	0.929617	1.22969	1.05752	1.05973	1.33434	1.49777	1.72711	2.20022
Vancomycin Inj.	0.256187	0.503607	0.498373	0.410501	0.392792	0.414771	0.695695	0.608252	0.356632	0.459331	0.461653	0.340507	0.611598	0.722088	0.545147	0.248812	0.431327	0.468757	0.463046	0.454334	0.357488	0.321668	0.479361	0.654971	0.830441	0.510177	0.485555	0.84924	0.760513	0.518214	0.641804	0.819769	0.679543	0.712705	0.709662	0.595413	0.794861	0.736252	0.421124	0.681743	0.629892	0.598799	0.691003	0.546626	0.588346	0.6094	0.540625	0.619747	0.558194
Linezolid Oral	0	0	0	0	0	0	0	0	0	0	0	0	0	0	0	0	0	0	0	0	0	0	0	0	0	0	0.0670031	0.018892	0.0916162	0.0557219	0.0309962	0.0353857	0.0737334	0.0193546	0.194619	0.152593	0.18241	0.100398	0.066127	0.12955	0.131464	0.161713	0.163463	0.188461	0.118732	0.176111	0.143657	0.154937	0.0788241
Linezolid Inj.	0.0454232	0.054608	0.107342	0.116379	0.18003	0.170788	0.213165	0.0684528	0.129851	0.254465	0.0867908	0.0671193	0.0597183	0.178608	0.109029	0.090477	0.167634	0	0.168542	0.0814949	0.0752605	0.0565092	0.0862849	0.208548	0.271006	0.436119	0.20536	0.122348	0.187173	0.187597	0.308139	0.15727	0.161416	0.157114	0.148384	0.134641	0.403545	0.23217	0.184459	0.216835	0.21753	0.282766	0.243337	0.273313	0.278224	0.357813	0.365517	0.152577	0.275884
Meropenem Inj.	0.141721	0.163824	0.578879	0.101567	0.286411	0.559127	0.59105	0.635633	0.543178	1.14294	0.969472	0.726852	0.869005	0.97214	0.793591	0.861271	0.966247	0.983651	0.894158	1.05332	0.807169	0.884586	0.462104	1.12257	1.2234	1.58813	1.06335	1.03096	1.04423	0.876691	1.10857	1.22277	1.106	1.45273	1.00428	0.664229	0.876385	1.10438	0.793524	1.0805	1.23709	1.25489	1.76837	1.82923	2.49161	2.47301	2.29001	2.6473	2.83253
Imipenem-Cilastatin Inj.	0.654095	1.34093	0.908572	0.649608	0.767172	0.79701	0.616242	0.864461	0.700462	0.666353	0.371169	0.438731	0.564235	0.597062	0.44148	0.30623	0.485949	0.393091	0.432886	0.603063	0.588914	0.545531	0.416085	0.638678	0.638801	0.927097	0.534285	0.491192	0.669882	0.661233	0.723853	0.772588	0.59186	0.512328	0.61289	1.38531	2.14001	0.740436	0.901415	0.957381	0.703663	0.71708	0.5424	0.51983	0.634421	0.579583	0.402919	0.327176	0.397976
Amphotericin B Liposome Inj.	0.0345217	0.188094	0.0881736	0.0698275	0.0265953	0.223651	0.0910798	0.095834	0.17923	0.295438	0.201281	0.0540228	0.0679553	0.13268	0.0393221	0.142675	0.214722	0.0922749	0.0159671	0.0611212	0.0809051	0.00652029	0.1649	0.0146635	0.00774304	0.153602	0.0348068	0.0485794	0.0256131	0.0018574	0.0218797	0.0727373	0.0179351	0.0865265	0.0408593	0.146609	0.0835623	0.357668	0.0904895	0.209485	0.100253	0.146003	0.0427233	0.0107182	0.0974669	0.0689536	0.022101	0.0361781	0.0555538
Voriconazole Inj.	0.247102	0.685634	0.437034	0.239106	0.345739	0.583525	0	0.416584	0.276161	0.191927	0.132956	0.147335	0.214162	0.497552	0.284191	0.29927	0.199653	0.293434	0.329987	0.376914	0.408288	0.0891107	0.233928	0.379622	0.181961	0.386747	0.231465	0.314867	0.399959	0.213601	0.353722	0.721475	0.42048	0.232255	0.311821	0.622341	0.931414	0.577289	0.466369	0.676231	0.327241	0.225474	0.0854466	0.334049	0.315438	0.285132	0.360417	0.3665	0.373558
Doxycycline Oral	0.150805	0.291243	0.149512	0.154467	0.0654654	0.00406638	0.143402	0.168198	0.204835	0.12292	0.177275	0.253744	0.261525	0.359768	0.23057	0.165294	0.233557	0.308198	0.429338	0.207812	0.158047	0.234731	0.126551	0.175962	0.0909807	0.386747	0.417682	0.244696	0.433453	0.473636	0.178684	0.491468	0.203265	0.309674	0.180641	0.278258	0.114134	0.290736	0.290611	0.367517	0.230771	0.282766	0.395655	0.448376	0.235693	0.745444	1.21046	1.82306	2.20193
Tigecycline Inj.	0	0	0	0	0	0	0	0	0	0	0	0	0	0	0	0	0	0	0	0	0	0	0	0	0	0	0.00870171	0.0125947	0.0118214	0	0.0109398	0	0	0	0	0	0.0244573	0.0230079	0	0.101067	0.00756627	0.0554444	0	0	0	0.00186361	0	0.00314593	0
Ornidazole Oral	0.0769106	0.0242702	0.0613382	0.0176262	0.0565866	0.0121991	0.0297075	0.0273811	0.0688757	0.035927	0.0510773	0.0130964	0.0404849	0.0102062	0.011314	0.0139195	0.0452046	0.030137	0.0224604	0.00814949	0.00312331	0.0101282	0.0261923	0.00107532	0.0271006	0.0146196	0.0231987	0.0131884	0.0197024	0.0191869	0.00849661	0.00916097	0.013272	0	0.0100213	0	0	0	0	0	0	0.00739258	0	0	0	0	0	0	0
Ornidazole Inj.	1.06381	1.66554	1.69063	1.23256	1.62436	1.03286	0.855569	0.966163	0.797393	0.898175	0.665704	0.908566	0.897834	0.690194	0.548722	0.473264	0.522678	0.421696	0.556187	0.550091	0.415814	0.500976	0.463062	0.264758	0.304882	0.250974	0.249739	0.171827	0.209831	0.276752	0.251616	0.161202	0.17138	0.329028	0.199996	0.163065	0.209925	0.356622	0.289741	0.147007	0.125789	0.10442	0.0835891	0.281351	0.127593	0.119271	0.114755	0.132129	0.095103
Metronidazole Oral	0.343999	0.544017	0.730921	0.370297	0.403021	0.392406	0.429548	0.495462	0.315171	0.265247	0.278839	0.194253	0.30133	0.29256	0.26453	0.160075	0.168255	0.180231	0.279708	0.311718	0.243336	0.239795	0.160413	0.123825	0.106467	0.117012	0.198399	0.132532	0.202935	0.257547	0.26923	0.253598	0.194616	0.207208	0.17991	0.197474	0.141974	0.179169	0.147324	0.102905	0.141224	0.20945	0.254482	0.234013	0.173668	0.22177	0.109927	0.158334	0.0508244
Metronidazole Inj.	0	0	0	0	0	0.0365974	0.0217041	0.0436142	0.0159113	0.00258778	0.0101564	0.0235736	0.0333599	0.0104613	0.0187674	0.0212273	0.0323966	0.00387555	0.0699004	0.00896444	0.0415814	0.0182568	0.0418002	0.00830933	0.0468454	0.074058	0.0113122	0.0111553	0.0721108	0.0278609	0.0423007	0.055241	0.0137503	0.0621624	0.0565579	0.0317154	0.102924	0.0629579	0.0873572	0.0178246	0.0750952	0.0942554	0.0456953	0.1572	0.12653	0.233697	0.0873841	0.0438857	0.073512
[truncated: 11 more columns]

## Sheet: “Driver’s License-Style” System
Table S5: Total Points Deducted by “Driver’s License-Style” System Quarterly
Time	Points Deducted
2020Q1	13.2
2020Q2	9.4
2020Q3	13.1
2020Q4	17.4
2021Q1	13.7
2021Q2	14.9
2021Q3	11.4
2021Q4	15.6
2022Q1	14.6
2022Q2	8.9
2022Q3	8.2
2022Q4	3
2023Q1	6
2023Q2	3.7
2023Q3	5
2023Q4	5.8
2024Q1	6.2
2024Q2	4.7
2024Q3	5.5
2024Q4	5.8

## Sheet: resistance
Table S6: Resistance Rates of S. aureus to oxacillin and E. coli to ceftriaxone
			2020Q2	2020Q4	2021Q2	2021Q4	2022Q2	2022Q4	2023Q2	2023Q4	2024Q2	2024Q4
Resistance rate of oxacillin against S. aureus		resistance (%)	33.22	31.4	30.79	28.53	31.46	33.94	30.05	30.42	28.83	30.6
		total cases (n)	304	774	445	1132	693	1370	396	812	437	866
Resistance rate of ceftriaxone against E. coli		resistance (%)	58.35	59.82	60.1	57.49	58.24	59.19	57.57	58.92	57.51	56.9
		total cases (n)	653	1640	1040	2482	1360	3426	740	1575	772	1796

## Sheet: surgical volume
Table S7: Changes in Surgical Volume from 2020 to 2024
Year and month	Surgical Volume (n)
2020.01	2353
2020.02	319
2020.03	1746
2020.04	3072
2020.05	2795
2020.06	2881
2020.07	4132
2020.08	3446
2020.09	3238
2020.10	2640
2020.11	3144
2020.12	2991
2021.01	2882
2021.02	2509
2021.03	3848
2021.04	3575
2021.05	3030
2021.06	3361
2021.07	4420
2021.08	3428
2021.09	3332
2021.10	2847
2021.11	3275
2021.12	3101
2022.01	3304
2022.02	2729
2022.03	3990
2022.04	3562
2022.05	3333
2022.06	3764
2022.07	4130
2022.08	3785
2022.09	3801
2022.10	3025
2022.11	3012
2022.12	1589
2023.01	2766
2023.02	4509
2023.03	4868
2023.04	4494
2023.05	4530
2023.06	4415
2023.07	5083
2023.08	5233
2023.09	4516
2023.10	4720
2023.11	5107
2023.12	4137
2024.01	4688
2024.02	3122
2024.03	5122
2024.04	5818
2024.05	4768
2024.06	4413
2024.07	6648
2024.08	4835
2024.09	4317
2024.10	4802
2024.11	5099
2024.12	4873
